# Supplementary material for: Krankenhausalarm- und -einsatzplanung in Baden-Württemberg. Eine länderspezifische Umfrage an 214 Kliniken
Source: Springer Nature journal article supplement (doi:10.1007/s10049-022-01065-1), 2022-08-16
Supplement: MOESM1 [file 23372460]

Zusatzmaterial zum Beitrag „Krankenhausalarm- und -einsatzplanung in Baden-Württemberg. Eine länderspezifische Umfrage an 214 Kliniken“ von Pfenninger EG, Villhauer S, Königsdorfer M (2022) in *Notfall+Rettenungsmedizin*.  
Beitrag und Zusatzmaterial stehen Ihnen auf [www.springermedizin.de](http://www.springermedizin.de) zur Verfügung. Bitte geben Sie dort den Beitragstitel in die Suche ein.

---

## Fragebogen zum Thema Katastrophenplan

**1. Über wie viele Betten verfügt Ihr Haus?**

- weniger als 300       300 – 499       500-1000       mehr als 1000

**2. Welchem Träger gehört ihr Krankenhaus an?**

- einem privaten Träger       einem staatlichen/ kommunalen Träger  
 einem kirchlichen Träger

**3. Verfügen Sie über einen Katastrophenplan / Notfallplan?**

- Ja       Nein

**4. Unterscheidet der Katastrophenplan interne und externe Katastrophenlagen?**

- Ja       Nein

**5. Für welche externen Lagen gibt es einen Plan?**

- Massenanfall von verletzten Patienten  
 Massenanfall von Verletzten bei Terroranschlag  
 Massenanfall von Infektionen  
 Massenanfall von intoxikierten Patienten

**6. Für welche internen Lagen steht ein Notfallplan zur Verfügung?**

- Brand       Bombenbedrohung       Amoklauf

**7. Für welche technischen Lagen gibt es einen Notfallplan?**

- Wasserausfall  
 Sauerstoffausfall  
 Heizungs- bzw. Klimaausfall  
 Stromausfall  
 EDV-Ausfall

**8. Hat die Rettungsleitstelle Kenntnis von Ihrem Katastrophenplan?**

- Ja       Nein

**9. Wird dieser Plan regelmäßig aktualisiert?**

- Ja       Nein

**10. Wann wurde der Katastrophenplan zuletzt aktualisiert?**

- vor weniger als 1 Jahr       vor 1 - 2 Jahren       vor 3 -5 Jahren  
 vor mehr als 5 Jahren

**11. Wie steht der Katastrophenplan den Mitarbeitern zur Verfügung?**

- in Schriftform ausliegend, jedem zugänglich  
 in Schriftform nur in Sekretariaten/Abteilungen  
 im Intranet für jeden verfügbar

**12. Gibt es eine personell definierte Klinikeinsatzleitung?**

- Nein       Ja

**13. Werden/ wurden Notfall-/ Katastrophenübungen durchgeführt?**

- Nein       Ja als

Stabsübung     Teilübung     Vollübung

**14. Wann wurde die letzte Übung durchgeführt?**

- vor weniger als 1 Jahr
- vor 1-2 Jahren
- vor 3-5 Jahren
- vor mehr als 5 Jahren
- Keine

**15. Werden verschiedene Szenarien geübt?**

- Ja     Nein     Keine

**16. Gibt es bei Ihnen Übungen, die auch externe Beteiligte (z.B. Rettungskräfte, Feuerwehr, Polizei, ABC-Zug) miteinbeziehen?**

- Ja     Nein     Keine Übungen

**17. Welche Schlussfolgerungen werden aus den Übungen gezogen?**

- Mängel werden behoben
- die Schulungen werden verbessert
- der Notfallplan wird angepasst
- es werden keine Übungen durchgeführt
